# Supplementary material for: The microbiota-gut-brain axis participates in chronic cerebral hypoperfusion by disrupting the metabolism of short-chain fatty acids
Source: PubMed Central journal article supplement (PMC9013454; doi:10.1186/s40168-022-01255-6), 2022-04-17
Supplement: 40168_2022_1255_MOESM5_ESM.pdf [file 40168_2022_1255_MOESM5_ESM.pdf]

**Table S1** Primer sequences used in real-time PCR analysis

| Primer                                                           | Sequence (5' to 3' )    |
|------------------------------------------------------------------|-------------------------|
| <i>actin</i> -rF                                                 | GTACAACCTTCTTGCAGCTCCTC |
| <i>actin</i> -rR                                                 | GTCCTTCTGACCCATACCCA    |
| <i>tumor necrosis factor alpha (TNF-<math>\alpha</math>)</i> -rF | GAAAAGCAAGCAACCAGCCA    |
| <i>TNF-<math>\alpha</math></i> -rR                               | ACTGATGAGAGGGAGCCCAT    |
| <i>interleukin-1 beta (IL-1<math>\beta</math>)</i> -rF           | AGGCTGACAGACCCCAAAG     |
| <i>IL-1<math>\beta</math></i> -rR                                | GGTCGTCATCATCCCACGAG    |
| <i>IL-6</i> -rF                                                  | AGCGATGATGCACTGTCAGAA   |
| <i>IL-6</i> -rR                                                  | GCATTGGAAGTTGGGGTAGGA   |
| <i>IL-4</i> -rF                                                  | ACCTGTCTGCTTTCTC        |
| <i>IL-4</i> -rR                                                  | GTTCTCCGTGGTGTTCCT      |
| <i>IL-10</i> -rF                                                 | CCTCTGGATACAGCTGCGAC    |
| <i>IL-10</i> -rR                                                 | AGTAGATGCCGGGTGGTTCA    |
| <i>mucin-2 glycoprotein (Muc2)</i> -rF                           | GAGTTGTATGTGCTCGCCTG    |
| <i>Muc2</i> -rR                                                  | CCACTGCTCACAGTCATTGGT   |
| <i>mucin-4 glycoprotein (Muc4)</i> -rF                           | GACCACCAGCAGAACTCAA     |
| <i>Muc4</i> -rR                                                  | AGGATTGTGGGTGGTCTTCA    |
| <i>occludin</i> -rF                                              | GGACTGTTTCAGAGCTCCGTC   |
| <i>occludin</i> -rR                                              | CACAGAGGTAGCACCACGTT    |
| <i>claudin-5</i> -rF                                             | CCTGCTAACCTGAAAGGGCA    |
| <i>claudin-5</i> -rR                                             | GGGACTGCTGGAATGAGACC    |
| <i>ZO-1</i> -rF                                                  | ACAGCCAGCTCTTGGTCATC    |
| <i>ZO-1</i> -rR                                                  | GTATGGTGGCTGCTCAAGGT    |
| <i>ionized calcium binding adaptor molecule 1 (Iba1)</i> -rF     | CGTCTGAGGAGCTATGAGCC    |
| <i>Iba1</i> -rR                                                  | ATGGCAGATCTCTTGCCAG     |
| <i>Fc RII/III receptor (CD16)</i> -rF                            | TCCGTGGCAGTCTATGAGGA    |
| <i>CD16</i> -rR                                                  | CAGATGGTGAGGTCGCAAGT    |
| <i>CD206</i> -rF                                                 | AGTCTGCCTTAACCTGGCAC    |
| <i>CD206</i> -rR                                                 | AGGCACATCACTTTCCGAGG    |

**Table S2** The main mass spectrometry conditions

| Settings                      | Parameters                                                                                                                                                                                                           |
|-------------------------------|----------------------------------------------------------------------------------------------------------------------------------------------------------------------------------------------------------------------|
| Sample Volume                 | 1 $\mu$ L                                                                                                                                                                                                            |
| Front Inlet Mode              | Split Mode(10:1)                                                                                                                                                                                                     |
| Front Inlet Septum Purge Flow | 3mL min <sup>-1</sup>                                                                                                                                                                                                |
| Carrier Gas                   | Helium                                                                                                                                                                                                               |
| Column                        | HP-FFAP (30m $\times$ 250 $\mu$ m $\times$ 0.25 $\mu$ m)                                                                                                                                                             |
| Column Flow                   | 1mL min <sup>-1</sup>                                                                                                                                                                                                |
| Oven Temperature Ramp         | 80 $^{\circ}$ C for 1min; raised to 200 $^{\circ}$ C at a rate of 10 $^{\circ}$ C min <sup>-1</sup> , hold on for 5min; raised to 240 $^{\circ}$ C at a rate of 40 $^{\circ}$ C min <sup>-1</sup> , hold on for 1min |
| Front Injection Temperature   | 240 $^{\circ}$ C                                                                                                                                                                                                     |
| Transfer Line Temperature     | 240 $^{\circ}$ C                                                                                                                                                                                                     |
| Ion Source Temperature        | 230 $^{\circ}$ C                                                                                                                                                                                                     |
| Quad Temperature              | 150 $^{\circ}$ C                                                                                                                                                                                                     |
| Electron Energy               | -70eV                                                                                                                                                                                                                |
| Mass Range                    | m/z: 33-150                                                                                                                                                                                                          |
| Solvent Delay                 | 4min                                                                                                                                                                                                                 |
